# Supplementary material for: AgInS2/CdSe type-II core/shell quantum dot-sensitized solar cells with an efficiency of 11.75% under 0.1 sun
Source: Royal Society of Chemistry journal article supplement (doi:10.1039/d3se01249b), 2023-11-27
Supplement: d3se01249b1.pdf [file d3se01249b1.pdf]

## Supplementary Information

### **AgInS<sub>2</sub>/CdSe Type-II Core/Shell Quantum Dot-Sensitized Solar Cells with an Efficiency of 11.75% Under 0.1 sun**

Siti Utari Rahayu<sup>1,2</sup>, Yu-Rou Wang<sup>1</sup>, Jen-Bin Shi<sup>3</sup> and Ming-Way Lee<sup>1,\*</sup>

*<sup>1</sup>Department of Physics and Institute of Nanoscience, National Chung Hsing University,*

*Taichung, 402, Taiwan*

*<sup>2</sup>Department of Physics, Faculty of Mathematics and Natural Sciences, Universitas Sumatera*

*Utara, Medan 20155, Sumatera Utara, Indonesia*

*<sup>3</sup>Department of Electronic Engineering, Feng Chia University, Taichung, 40724, Taiwan*

---

\* Corresponding author: M. W. Lee, Email: [mwl@phys.nchu.edu.tw](mailto:mwl@phys.nchu.edu.tw). Tel: 886-4-22852783. Fax: 886-4-22862534

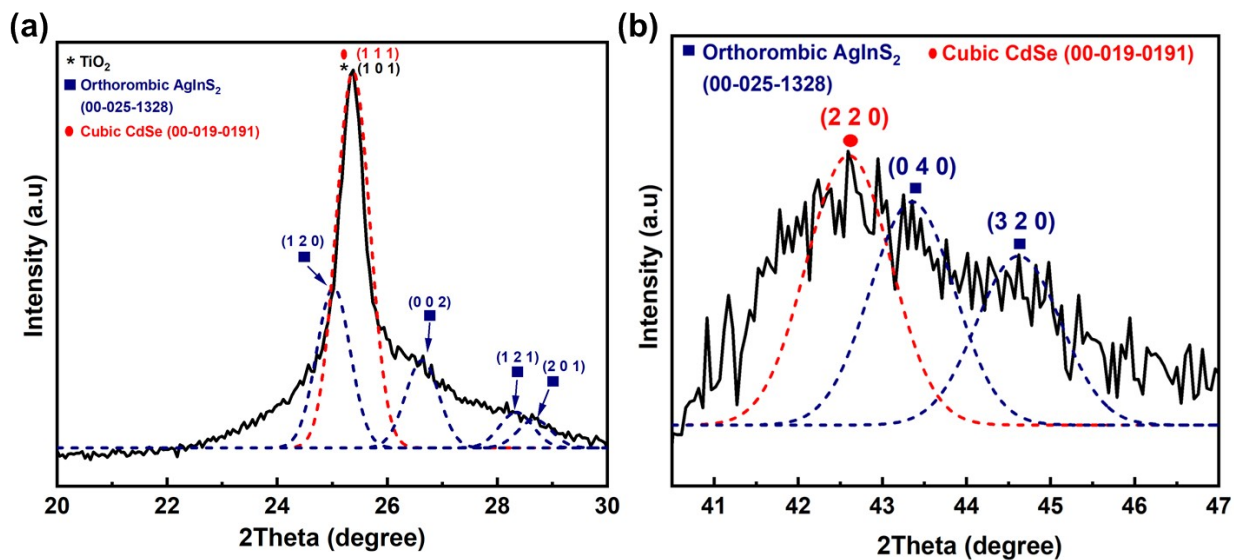

**Fig. S1.** The deconvoluted spectra analysis of XRD pattern of  $\text{TiO}_2/\text{AgInS}_2/\text{CdSe}$  core-shell at the angle of (a)  $20^\circ$ - $30^\circ$  and (b)  $40^\circ$ - $47^\circ$

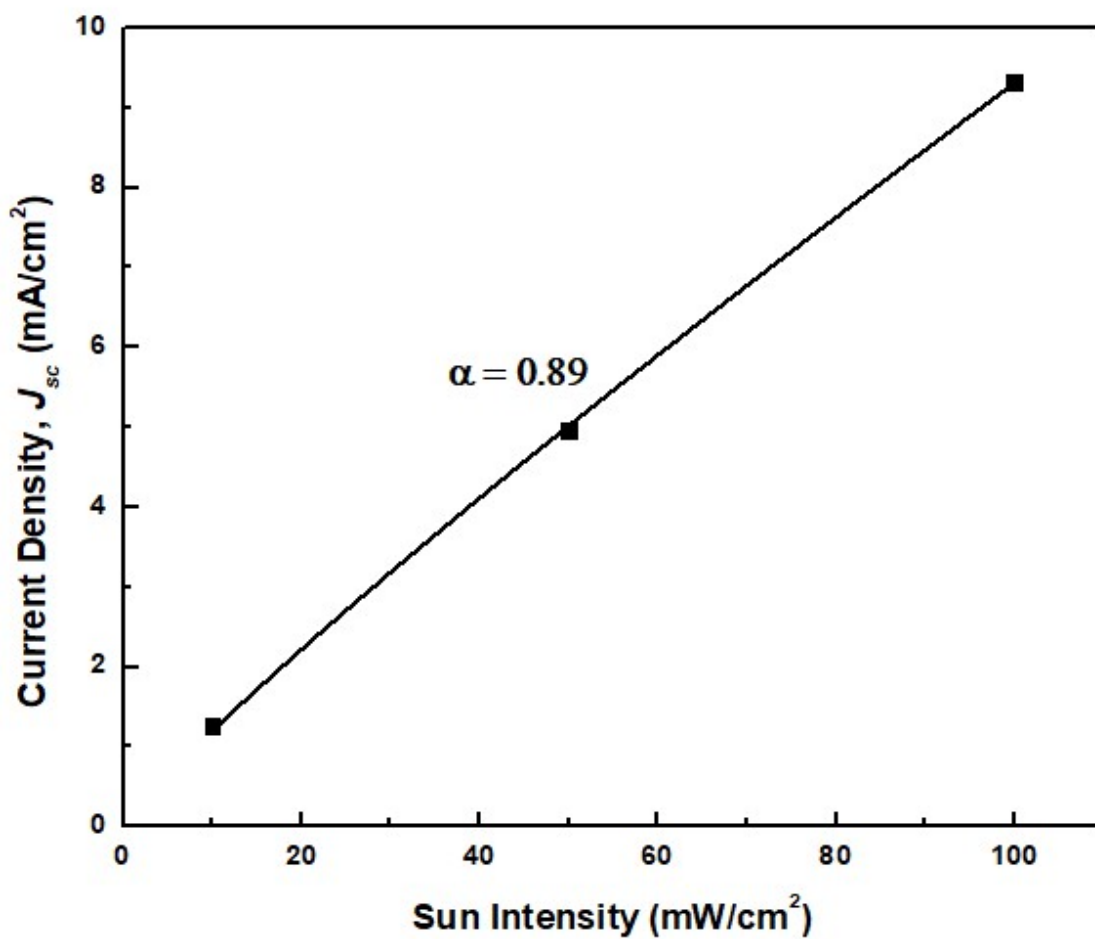

**Fig. S2.** Sun intensity dependence of the current density,  $J_{sc}$ . The data are fitted with the power law equation to determine the degree of linearity of the photocurrent with the sun intensity.
